# Supplementary material for: Striatal cholinergic interneuron pause response requires Kv1 channels, is absent in dyskinetic mice, and is restored by dopamine D5 receptor inverse agonism
Source: eLife. 2025 Jun 24;13:RP102184. doi: 10.7554/eLife.102184 (PMC12187130; doi:10.7554/eLife.102184)
Supplement: Figure 1—source data 1. [file elife-102184-fig1-data1.xlsx]

## Sheet: Figure 1 E-F
X1/Average ISI	With Stimulus
0	0.291134	0.260716	0.566216	0.597862	0.309664	0.699882	0.97615	0.833138	0.383867	0.465965	0.771164	0.442443	0.320982	0.22776	0.604185	0.307797	0.333594	0.435144	0.241254	0.324142	0.558533	0.243905	0.324216	0.349657	0.760933	1.02623	0.196718	0.829733	0.446519	0.43468	0.686694	0.379837	0.769801	0.931006	0.274838	1.45897	0.130001	0.303393	0.295005	0.473499	0.219969	0.349571	0.22565	0.751643	0.232863	0.376078	0.545224	0.265133	1.04149
0.25	0.275742	1.62353	0.202296	1.04546	0.669318	0.266347	0.573945	1.07457	0.304421	0.149624	0.126154	0.650066	0.164181	0.081994	0.725994	0.268015	0.117281	0.115375	0.525781	0.157202	0.096377	0.280323	0.188159	0.227839	0.722347	0.257314	0.27665	0.392198	0.503869	0.26053	0.08299	0.171004	0.526921	0.119469	0.085296	0.351393	0.113395	0.153945	0.303647	0.183034	0.256783	0.271422	0.681736	0.95948	0.147787	0.378795	0.539155	0.339748	0.268529
0.5	0.303513	0.404044	0.117608	0.293354	0.086374	0.109071	0.253306	0.105776	0.244112	0.100468	0.360586	0.148791	0.402736	0.074306	0.191318	0.10448	0.091075	0.187863	0.443844	0.150267	0.107076	0.092807	0.363326	0.446725	0.065604	0.062144	0.238046	0.090192	0.203253	0.198621	0.015746	0.203464	0.305976	0.461652	0.133251	0.511672	0.090473	0.080419	0.196965	0.221509	0.142909	0.787059	1.04357	0.027355	0.092019	1.00053	0.120594	0.109998	0.091221
0.75	0.125963	0.132732	0.328885	0.106053	0.101251	0.328062	0.416153	0.4104	0.093264	0.710953	0.083096	0.09444	0.167462	0.130623	0.080979	0.336829	0.006851	0.08194	0.062475	0.02486	0.038203	0.204282	0.046406	0.082055	0.284802	0.389466	0.032738	0.388861	0.01462	0.284427	0.327218	0.768402	0.010751
1	0.088159	0.010641	0.122114	0.123962	0.227509	0.21368	0.22703	0.118229	1.7594	0.20459	0.276722	0.093744	0.022976	0.276321	0.305236	0.057767	0.059281	0.157445	0.028692	0.255067	0.165823	0.101788	0.146554	0.150216	0.022469
1.25	0.185742	0.526243	0.032323	0.05659	0.614529	0.116292	0.078478	0.103046	0.16615	0.227754	0.339082	3.97182
>1.5	0.102611	0.091162	0.022045	0.091792	0.19573	0.081532
[truncated: 83 more columns]

## Sheet: Figure 1 H
Elicited spikes
1	1.84691	1.11295	1.31045	1.30886	1.20956	0.973102	1.58386	1.45705	1.33038	1.32605	2.08133	1.46165	1.17606	1.52485	1.2848	1.28093	1.42179
2	3.16072	1.39737	1.86358	1.54598	1.76939	1.28237	1.58677	1.84902	1.36243	1.04298	1.29756	1.74918	1.47968	1.34864	2.70272	1.1746
3	2.49047	1.78716	1.55415	1.87299	2.31276	2.66033	2.31588	2.17935	1.67234	2.43245			1.05613	3.29241	2.13688	3.04396	1.21344
4	2.32803	1.81071	1.81071	3.54163	2.56662	1.71675	2.62366	2.24344					1.79403	3.40788		2.83108	1.81353

## Sheet: Figure 1 I
1 spike	2 spikes	3 spikes	4 spikes
241.621	227.05	472.894	573.638
243.496	230.445	168.525	169.304
309.064	306.199	248.083	301.632
474.575	306.63	301.125	279.147
322.845	307.247	260.518	283.011
660.016	400.265	299.104	252.565
518.244	580.872	372.832	658.702
753.381	471.73	618.102	793.021
599.06	659.772	528.792	352.075
346.532	528.629	767.894	247.06
286.044	334.014	478.833	589.068
637.861	285.146	333.861	444.607
522.92	631.659	263.011	722.546
580.707	539.229	578.901	498.344
472.731	557.928	572.596
	476.591	567.803
		486.292

## Sheet: Figura 1 K
Elicited spikes		1 train																2 trains
1	1.84691	1.11295	1.31045	1.30886	1.20956	0.973102	1.58386	1.45705	1.33038	1.32605	2.08133	1.46165	1.17606	1.52485	1.2848	1.28093	1.42179	0.799907	1.04136		0.978481		0.670003	0.795732	1.1781	1.48958	1.25918	1.02211
2	3.16072	1.39737	1.86358	1.54598	1.76939	1.28237	1.58677	1.84902	1.36243	1.04298	1.29756	1.74918	1.47968	1.34864	2.70272	1.1746		1.1413	1.29088		0.91285	1.55686	0.814588	0.772469	1.07649	1.10486	1.12737	1.13413
3	2.49047	1.78716	1.55415	1.87299	2.31276	2.66033	2.31588	2.17935	1.67234	2.43245			1.05613	3.29241	2.13688	3.04396	1.21344	0.885781	1.34137	0.731183	0.952401	1.14348	1.18012	2.51632	0.986708	2.1466	1.25497	0.963736
4	2.32803	1.81071	1.81071	3.54163	2.56662	1.71675	2.62366	2.24344					1.79403	3.40788		2.83108	1.81353	1.7973	1.90026	0.599689	1.76427	3.47183	1.906	0.810215	0.997	1.44369		0.846213
