# Supplementary material for: Striatal cholinergic interneuron pause response requires Kv1 channels, is absent in dyskinetic mice, and is restored by dopamine D5 receptor inverse agonism
Source: eLife. 2025 Jun 24;13:RP102184. doi: 10.7554/eLife.102184 (PMC12187130; doi:10.7554/eLife.102184)
Supplement: Figure 2—source data 1. [file elife-102184-fig2-data1.xlsx]

## Sheet: Figure 2 C
Elicited spikes	Control									Mgtx 30nM												MgTx 3nM									Dtx 100nM
1	1.31045	1.30886	1.20956	0.973102	1.58386	1.45705	1.33038	1.28093	1.42179	1.34272	1.20985		1.36907	1.72587	1.34831	0.958958	0.996549	1.10732	0.596134	1.0633	1.17636	1.46848	1.18937	1.12493	4.08576	1.87855	1.43456	1.725	1.73472	1.59737	1.55514	1.7353	0.916346	1.11034	1.24319	1.00813	1.50044	1.07034			1.02021	4.37221	1.21148	1.04382
2	1.86358	1.54598	1.76939	1.28237	1.58677	1.84902	1.36243	2.70272	1.1746	1.60543	1.17857		1.80087	1.63081		0.992139	1.44427	1.16504	0.89111	1.71181	1.38817	1.81557	1.31163	1.41982	3.40043	2.06747	1.78739	1.76828	1.4465	1.80522	1.75732	1.22351	0.897402	1.0609	1.18098	1.07521	1.41252	1.20126	1.22172	1.06429	1.31152	2.43695	1.27795	1.07107
3	1.55415	1.87299	2.31276	2.66033	2.31588	2.17935	1.67234	3.04396	1.21344	1.63616	1.15842		1.42495	1.86539		0.862772	1.21577	1.16414	1.34869		1.38435	1.82553	1.53459	2.37383	2.96138	2.21611	3.15485	2.95777	1.73322	1.56309	1.96128	1.32274	0.893153	1.12921	1.29357	1.0086	1.4202	1.29954	1.44942	1.94959	2.05023	2.96116	1.93196	1.08144
4	1.81071	3.54163	2.56662	1.71675	2.62366	2.24344		2.83108	1.81353	1.79545	1.00815	1.65023		2.12925		1.38682	1.28715	1.37123	1.95996		1.55328	1.78021	1.83185	1.96839		2.63241	3.48814	3.6613	1.55829	1.92053	2.83329	0.625963	0.952152	1.15203	0.793167	1.06648		1.35495	1.30046	2.35913	2.72888	2.62023	1.60436

## Sheet: Figure 2 D
Baseline ISI (ms)
Control	MgTx 30nM	MgTx 3nM	Dtx 100nM
708.742	504.969	652.84	304.217
507.79	484.072	315.417	553.908
362.268	292.418	461.226	658.541
263.235	513.91	665.41	282.005
623.852	610.426	698.281	402.088
539.624	535.326	815.294	489.757
570.305	578.513	387.292	755.569
453.644	630.341	593.573	459.374
793.262	461.049	562.786	462.01
297.278	185.401	609.234	651.531
471.475	811.902	594.243	470.577
	757.127	483.051	254.803
	365.61		331.936
	603.974		217
	569.709

## Sheet: Figure 2 E
Elicited spikes	Control									Mgtx 30nM												MgTx 3nM									Dtx 100nM
2	246.027	150.811	88.48	293.979	188.1	246.027	150.811	88.48	94.475	169.98	134.896	155.567		189.314	190.269	228.106	219.533	130.385	288.569	429.29	113.681	394.817	204.41	177.359	452.694	176.893	205.529	103.213	294.567	166.771	262.21	521.144	301.739	277.458	459.069	338.931	543.003	305.47	357.35	188.6	145.114	185.88	114.98	204.344
3	447.175	349.95	157.857	503.25	457.24	447.175	349.95	157.857	134.071	241.764	217.464	266.222		299.225	297.288	359.275	404.2	213.54	512.633	646.369	107.75	617.75	257.719	422.593	819.14	297.411	220	150.675	434.092	341.65	471	785.339	644.317	504.645	661.75	625.005	870.212	414.458	654.8	430.962	330.415	344.936	214.011	303.17
4	235.911	189.208	443.723	669.875	712.69	235.911	189.208	443.723	461.794	362.925	233.656	293.8	126.45	501.1	411.914	588.5	593.75	288.514	713.3	1006.97	238.218	807.375	462.517	641.032		444.314	288.1	212.78	631.75	444.606	762.25	987.55	804.407	764.469	855.65	812.862		613.695	823.533	656.817	446.3	590.283	318.65

## Sheet: Figure 2 G
Elicited spikes	Control										Barium 10uM									XE991
1	0.973102	1.58386	1.45705	1.33038	1.32605	2.08133	1.46165	1.17606	1.52485	1.2848	1.14925	0.772553	1.49925	1.47829	1.05505	1.30245	1.96671	1.15458	1.14431	1.67806	1.75459	1.03202		0.995756	1.26424	1.48811	1.22007	1.56705
2	1.28237	1.58677	1.84902	1.36243	1.04298	1.29756	1.74918	1.47968		1.34864	1.50975	1.64217	1.73259	2.24468	1.07513	1.13966	2.41195	0.90134	1.06416		2.38373	1.92922	2.19205	2.57587	2.17925	1.92449	1.49138
3	2.66033	2.31588	2.17935	1.67234	2.43245			1.05613	3.29241	2.13688	1.50837	2.20958	2.64595	2.61111	1.03623	1.31382	5.25237	1.54023	0.989668	2.13851	2.17655	1.75159	1.67305	1.91997	2.94869	1.80708	1.45752	2.58645
4	1.71675	2.62366	2.24344					1.79403	3.40788		1.94652	2.65317	2.97333	3.18351	1.10891		2.67296	1.93517	1.10972	2.35261	2.50054	2.23063	1.7616	2.66485	3.9372	2.32103	1.55247	3.03846

## Sheet: Figure 2 H
Baseline ISI (ms)
Control	Barium 10uM	XE991
620.098	737.614	728.703
563.001	337.351	595.28
708.742	388.701	824.309
507.79	818.581	511.889
362.268	319.996	473.232
263.235	512.845	401.679
623.852	375.267	641.456
539.624	237.245
570.305	213.197
453.644
793.262
814.41
190.183
254.427
291.871
311.806

## Sheet: Figure 2 I
Elicited spikes	Control										Barium 10uM									XE991
2	293.979	188.1	246.027	150.811	88.48	94.475	126.985	186.197	327.644	251.812	217.323	75.9875	139.692	65.1167	332.25	498.631	69.825	120.612	259.217	122.028	146.525	218.017	308.25	143.455	116.042	335.583	217.63	249.662
3	503.25	457.24	447.175	349.95	157.857	134.071	261.7	325.081	487.6	285.325	404.25	126.472	264.983	124.267	597.029	795.212	167.923	238.875	494.2	343.822	312.875	247.15	428.413	323.836	213.758	558.031	394.3	507
4	669.875	712.69	235.911	189.208	443.723	461.794	651.925	354.725			690.75	222.54	355.74	193.25	818.896		259.688	293.017	541.9	542.567	398.45	386.63	546.35	479.383	273.029	840.263	539.494	580.975
