# Supplementary material for: Striatal cholinergic interneuron pause response requires Kv1 channels, is absent in dyskinetic mice, and is restored by dopamine D5 receptor inverse agonism
Source: eLife. 2025 Jun 24;13:RP102184. doi: 10.7554/eLife.102184 (PMC12187130; doi:10.7554/eLife.102184)
Supplement: Figure 3—source data 1. [file elife-102184-fig3-data1.xlsx]

## Sheet: Figure 3 C
Elicited spikes	Control										SKF81297														SCH23390														SKF81297 + SCH23390
1	1.84691	1.30886	1.20956	1.58386	1.45705	1.33038	1.32605	1.52485	1.2848	1.28093	1.2374	1.14105	0.794657	3.2463	1.94692	1.22884	1.28001	1.74569					0.657673	0.959094	0.86303	1.78458	1.75606	1.88755	1.78189	0.965642	1.26849	1.65132	1.57742	2.3954	1.32135	0.878946	1.97507	1.14541	1.72831	0.618161	3.54616	1.93228	1.27715	0.829741	1.23492	1.58641
2	3.16072	1.54598	1.76939	1.58677	1.84902	1.36243	1.04298	1.02385	1.34864	2.70272	1.45252	1.70451	1.03659	0.742595	1.11768	1.0809	1.20621	1.58586	1.86011			0.80385	0.92007	0.887287	1.14362	2.1269	2.88301	1.52785	1.60263	1.35389	1.32498	2.48202	1.55201	2.04107	2.41588	2.4246	3.39299	1.12681	2.21301	1.23077	3.29679	2.95173	1.27233	1.16654	1.1063	2.23827
3	2.49047	1.87299	2.31276	2.31588	2.17935	1.67234	2.43245	3.29241	2.13688	3.04396	1.05364	1.56997	1.31058	1.97849	1.3918	1.11359	1.75154	1.03472	1.30059	1.73162	1.30672	1.64752	0.861268	0.895279	1.6017	2.20504	3.4991	2.15252	1.96715	1.70345	2.64601	1.24773	1.32787	3.05566	3.13585	2.48259	1.81777	1.02341	1.72658	1.72552	2.48552	4.4658	2.87934	0.908389	1.22128	2.27719
4	2.32803	3.54163	2.56662	2.62366	2.24344			3.40788		2.83108		1.94123	1.34625	0.553585	1.38127	2.58887	1.96675	0.994213	1.45524	2.95312	2.28619	0.761865	0.389099	0.878738	1.97857		4.54099	2.16188	3.41255	2.1492	2.64601	1.02438	1.52227	4.64539	3.53489	2.43858	2.26741	1.03599	1.72163	1.85541	3.89497	2.93102		2.54266	1.17862	3.09928

## Sheet: Figure 3 D
Baseline ISI (ms)
Control	SKF81297	SCH23390	SKF81297 + SCH23390
623.852	350.817	567.745	842.257
539.624	335.731	910.585	278.987
570.305	345.91	198.528	291.705
453.644	580.088	645.207	540.783
793.262	306.043	609.167	294.793
814.41	331.859	329.942	648.803
190.183	324.629	415.279	563.348
254.427	131.927	485.778
311.806	155.424	1016
471.475	152.465	573.183
	231.757	321.132
	641.307	713.244
	476.682	386.121
	479.481	449.381
	496.426	413.835

## Sheet: Figure 3 E
Elicited spikes	Control										SKF81297														SCH23390														SKF81297 + SCH23390
2	150.811	88.48	94.475	126.985	186.197	327.644	251.812	243.483	194.285	392.39	213.662	168.619	129.167	310.85	191.457	135.119	141.607	80.525	120.714			133.935	207.618	331.088	262.975	430.095	114.112	286.35	236.217	242.206	517.411	498.383	421.119	148.5	78.87	85.8885	133.625	343.139	103.545	103.533	137.311	69.0222	582.817	211.105	267.043	446.9
3	349.95	157.857	134.071	261.7	325.081	487.6	285.325	345.883		697.2	433.006	236.331	266.106	531.556	155.387	355.407	640.814	267.323	259.75	159.7	305.833	223.257	366.42	656.556	469.814	658.492	175.782	402.508	365.473	405.664	202.24	856.908	555.1	118.66	130.492	193.221	213.186	634.333	195.76	576.4	224.178	177.7	252.4	312	418.257	468.2
4	189.208	443.723	461.794	651.925	354.725					772.75		430.3	370.956	737.35	290.792	400.8	652.481	380.961	240.711	137.283	381.075	353.4	676.95	841.88	631.237		264.429	591.74	522.107	583.354	349.7	964.1	861	212.78	261.745	440.65	345.025	892.04	394.938	215.113	283.812	419.45		249.05	536.675	624.9

## Sheet: Figure 3 G
Elicited spikes	Control																		Sulpiride												Mecamylamine
1	1.84691	1.30886	1.20956	1.58386	1.45705	1.33038	1.32605	1.52485	1.2848		1.10043	1.75988	1.39007	0.830472	1.11635	1.37532	2.48378	1.28979	1.46628	1.19251	1.0232	1.18244	1.28837	1.10165	2.48514		1.79427	1.26502	1.31684	1.17994	1.15517	1.46425	1.74777	1.68854	1.50325	1.1712	1.33571	1.32407	1.53031	1.47726	1.1094	1.31514
2	3.16072	1.54598	1.76939	1.58677	1.84902	1.36243	1.04298	1.02385	1.34864		1.15017	3.78353	1.15816	1.09922	1.20607	1.71553	3.05479	2.82564	2.68033	1.45566	1.07475	1.20672	1.19433	1.53516	1.13518	2.59866	2.38728	2.40576	2.15061	1.5489	1.61344	2.19623		1.82298	1.83766	2.16541	2.17371	1.72958	1.4494	1.85895	1.55055	1.98118
3	2.49047	1.87299	2.31276	2.31588	2.17935	1.67234	2.43245	3.29241	2.13688		1.3082	4.58546	1.48172	1.39521	1.0594	1.59986	3.02289	3.08141	4.51621	1.14253	1.26898	1.27117	1.99975	1.92461	1.16407	1.79191		1.32242	2.32643	1.85612		2.26514		2.02836	1.96891	2.13566	1.23403	2.04892	1.42934	1.45024	1.04547	1.45531
4	2.32803	3.54163	2.56662	2.62366	2.24344			3.40788		2.83108			1.68724	1.42579			2.71063	2.65934	2.66488	1.46345	1.64628	1.41454	1.50527	1.2679	1.30619				2.1778	1.88258		2.54684				1.95733	1.62684	2.11929	1.53206	1.46402		1.44308

## Sheet: Figure 3 H
Baseline ISI (ms)
Control	Sulpiride	Mecamylamine
623.852	838.823	418.674
539.624	254.077	665.212
570.305	272.336	635.249
453.644	273.745	834.672
793.262	525.954	477.164
814.41	474.859	459.102
190.183	200.861	490.953
254.427	470.126	358.6
311.806	811.673	371.903
471.475	515.678	259.606
468	546.611	360.854
184.896	399.913	771.622
441.752
162.477
468
609.917
585.351
407.509
753.646

## Sheet: Figure 3 I
Elicited spikes	Control																		Sulpiride												Mecamylamine
2	150.811	88.48	94.475	126.985	186.197	327.644	251.812	243.483	194.285	392.39	324.2	197.915	121.67	137.136	324.2	356.397	341.663	169.262	308.478	162.6	144.194	217.579	257.775	236.046	192.594	290.15	287.465	205.78	232.167	254.721	154.25	171.35	126.493	492.63	191.007	169.594	254.24	193.61	154.07	157.62	132.675	175.117
3	349.95	157.857	134.071	261.7	325.081	487.6	285.325	345.883		697.2	598.407	293.769	290.12	272.43	598.411	747.9	602.163	576.633	544.672	361.475	272.975	421.038	373.975	429.067	316.269	424	513.881	332.8	460.867	434.188		372.831	217.9	600	310.575	300.025	337.99	372.65	358.84	271.587	242.05	360.57
4	189.208	443.723	461.794	651.925	354.725					772.75	726.837		359.95	365.289	726.837			713.025	666.117	433.164	302.833	618.039	713.9	443.392	499.244		799.375	481.85	618.55	589.883	348.3	559.9			441.387	461.514	500.18	428.825	422.5	305.1		433
