# Supplementary material for: Striatal cholinergic interneuron pause response requires Kv1 channels, is absent in dyskinetic mice, and is restored by dopamine D5 receptor inverse agonism
Source: eLife. 2025 Jun 24;13:RP102184. doi: 10.7554/eLife.102184 (PMC12187130; doi:10.7554/eLife.102184)
Supplement: Figure 4—source data 1. [file elife-102184-fig4-data1.xlsx]

## Sheet: Figure 4 C
Sag (mV)
Control	ZD7288	ZD7288 + SKF81297
1.6	-0.04	0.48
2.9	-0.25	0.11
1.4	0.27	0.23
1.04	0.2	-0.76
1.85	0.33	0.13
4.16	0.21	0.26
2.62	-0.14	-0.06
7.19	0.15	0.11
1.8	0.27	0.15
7.17	0.11	-0.1
4.36	0.17	0.67
3.32	0.17

## Sheet: Figure 4 E
Elicited spikes	Control											ZD7288														ZD7288 + SKF81297
1	0.502237	1.82621	1.38447	1.36219	1.81829	3.22451	3.86786	1.13566				1.32215	1.09089	1.33404	0.964699	1.27405	3.38574	1.76647	1.39787	1.8126	1.65108	2.50271	1.52285	1.62322	2.2646	1.23881	1.31586	1.83506	2.41979	2.37543	1.78506	1.51081
2	1.89193	1.98818	1.42921	4.08605	4.7889	1.9709	1.18643	3.25699	2.31456			1.80423	1.40844	1.54961	1.48789	2.87075	1.81018	2.93775	3.42609	1.47429	2.74566					1.09725	1.21599	1.22194	2.43719	2.11306	1.43771	2.3247	2.13558	2.06916	1.90803	0.739025
3	2.06003	4.53372	2.26054	1.48032	4.314	2.03576	2.8866	2.35247	4.40627	4.41111	2.71425	1.99457	1.54557	2.94069	2.46043	4.41289	2.06626	3.2107	5.8647	2.80578	3.55761					1.00995	2.83283	2.51487	2.78327	1.97096	1.6114	0.674431
4	6.40033	4.66181	1.83708	4.43544	2.61473	2.65453	1.1582	2.56481	5.81567	3.60672		1.75899	2.51317	1.16676	2.32345	8.63224	4.67167	3.41842	1.79456	3.23845	6.36192	2.21177	3.5623			0.767446	2.23068	3.81918	0.368235	1.83073	1.52699	0.918448

## Sheet: Figure 4 F
Baseline ISI (ms)
Control	ZD7288	ZD7288 + SKF81297
884.499	956.209	625.7
1138.37	706.247	429.201
752.927	790.002	737.999
266.608	552.278	852.284
587.368	562.289	776.584
422.433	585.972	465.283
804.089	497.367	720.089
529.399	663.545	685.486
577.898	729.551	770.464
595.492	644.821	783.835
550.021	727.369	754.015
726.576	655.037

## Sheet: Figure 4 G
Elicited spikes	Control											ZD7288														ZD7288 + SKF81297
2	382.7	313.693	235.661	224.26	225.25	196.6	210.635	224.586	312.143	406.436	327.163	336.417	247.283	280.85	206.907	338.8	137.2	185.194	334.036	433.272	327.325	212.062	418.9	294.767		280.486	200.685	201.771	320.413	177.364	241.128	261.905
3	716.825	175.225	652.793	404.957	301.85	376.85	536.8	375.15	470.533	341.3	337.81	595.013	387.59	364.957	385.8	874.575	508.842	231.533	265.633	308.333	487.5	553.25	407.633	890.925	735.5	224.15	341.683	304.97	346.55	368.238	326.45	477.21	518.78	393.35	793.836	495.45
4	257	606.15	634	542.2	478.85	742.987	498.025	440.25	477.02	574.84	1125.1	494.87	527.663	531.758	707.458	273.633	422.117	539.183	808.471	753.993	499.6	980.225	1044.95			343.3	540.525	415.41	569.6	532.763	538	685.675
