# Supplementary material for: Striatal cholinergic interneuron pause response requires Kv1 channels, is absent in dyskinetic mice, and is restored by dopamine D5 receptor inverse agonism
Source: eLife. 2025 Jun 24;13:RP102184. doi: 10.7554/eLife.102184 (PMC12187130; doi:10.7554/eLife.102184)
Supplement: Figure 5—source data 1. [file elife-102184-fig5-data1.xlsx]

## Sheet: Figure 5 C
Rotation index
Sham	6-OHDA
0.58	0.98
0.47	1
0.62	1
0.64	0.95
0.28	1
	0.85
	0.86
	1
	1
	1
	0.94
	1
	1
	0.73
	1
	1
	1
	1
	0.97
	1

## Sheet: Figure 5 D
Forelimb assymmetry index
Sham	6-OHDA
0.33	0
0.7	0
0.33	0
0.56	0
0.44	0
	0
	0
	0
	0
	0
	0
	0
	0
	0
	0
	0
	0
	0
	0
	0.15

## Sheet: Figure 5 E
Trial	Sham					6-OHDA
1	25	155	104	97	58	16	3	2	32	5	15	104	58	89	9	43	40	13	46	4	72	3	36	63	3
2	300	126	213	119	71	36	7	13	64	90	29	200	54	92	18	59	69	39	202	2	169	2	67	89	18
3	100	184	211	200	100	52	11	19	71	118	28	212	18	111	13	94	64	45	255	62	181	16	93	116	53
4	262	177	263	270	103	58	20	14	125	127	41	180	51	124	38	92	116	57	288	39	155	20	94	112	62
5	159	177	258	265	110	20	21	52	110	132	28	200	42	135	30	103	164	62	230	59	182	37	125	91	73

## Sheet: Figure 5 F
Time post L-dopa	Day 1																				Day 4																				Day 8
20	6	3	3	5	3.5	4.5	5	1	8	1	1	3	0.5	1.5	6	0	6	6	6	3	7	6	7.5	6	8.5	9	9	7	9	6	9	9	9	9	9	9	9	3	3	0	6.5	6	8.5	6	8.5	6	8	7	8
40	7	4.5	6	6	6	6	8	1	9	3	3	6	1	6	7.5	0	6	6	9	6	7.5	5.5	7.5	7.5	9	9	9	9	10	6	9	9	10.5	10.5	9	10.5	9	9	9	3	8.5	5.5	9	7.5	9	7.5	10	9	12
60	7.5	6	5.5	6.5	7	7.5	9	2	9	3	3	6.5	3	6.5	9	0	9	9	9	6	7	6	7.5	6.5	7	7.5	9	6	9	12	12	6.5	9	6.5	9	12	12	12	9	3	8	6.5	8.5	8.5	10	9	11	9.5	12
80	7.5	5.5	6	4	5.5	6	7.5	0.5	8.5	9	0.5	0	0	9	6.5	0	3	9	9	3	6.5	4	7	4	5.5	6	7.5	4	8.5	9	6	6	3	9	6.5	12	12	12	9	3	6	5	7.5	8	6.5	8	10	12	12
100	3	3	4.5	1	0.5	0.5	2	0	6	0	1.5	0	0	6	6	0	0	6	6	0	4	5.5	4	1	2	2	2	0	6	0	3	0	0	6	6	9	9	6	6	0	3	1.5	4.5	5.5	6.5	5.5	6	3	9
120	0	0	1	0.5	0	0	0	0	1	0	0	0	0	0	1	0	0	0	0	0	0	0	0	0.5	0	0	0	0	1	0	0	0	0	0	1	6	6	0	3	0	0	0	0	3	0.5	0	0	0	4
[truncated: 31 more columns]

## Sheet: Figure 5 H
Elicited spikes	OFF L-DOPA																							Sham																									OFF L-DOPA + MgTx
1	1.42508	1.0536	2.3309	1.57841	1.35322	0.998809	0.999256	1.44436	1.1572	0.819207	1.44436	1.1572	1.09341											1.53774	1.32851	2.08556	0.874273	1.02791	0.979762	1.20578	1.1096	1.26302	1.01285	1.5253	1.30719	1.13578	1.54679	1.23375	2.07354	1.18223	0.957957	1.87	1.00285	1.2264	1.1437				2.24841
2	2.52301	1.71882	1.13006	2.3686	1.86101	2.11454	2.21527	1.52329	1.38964	1.10447	1.26167	0.99088	1.27328	1.10698	1.10687	0.99088	1.27328	1.10698	1.23193	1.10251	1.00257			1.4832	1.14955	1.245	2.53438	2.62706	0.998558	1.53834	1.59182	1.52485	1.70876	1.20142	1.82606	1.39324	1.29777	1.13918	1.66031	0.979142	2.40112	1.34165	1.54934	2.48925	1.44708	1.21765	1.62412		1.68111
3	2.755	2.00388	1.02334	2.68983	2.20697	2.33258	2.44041	2.37111	1.49732	0.762574	1.51873	1.06759	0.811427	1.26662	1.0523	0.811427	1.26662	1.34171	1.08545	0.966082				0.912144	1.33027	1.62288	2.84387	1.63215	1.63725	4.55905	3.40319	2.62564	1.87695	2.04774	1.10277	1.89637	1.81624	1.11241	1.21969	1.86641	1.33399	1.37747	1.77969	1.93508	4.90075	2.53233	1.5378	1.3773	1.82711
4	2.92833	2.08002	2.78601	0.73974	3.231	2.37612	2.24455	3.38665	1.0749	1.90777	0.942601	1.22564	1.03248	0.985989	0.86164	1.11046	1.03248	0.985989	0.86164	1.11046	1.38795	0.98907	1.25548	1.21075	2.41826	2.01773	2.38751	1.68469	3.58137	3.37955	2.67791	2.17346	2.20152	1.25305	1.69108	2.2091	0.985671	2.47051	2.32747	1.6459	1.96257	5.39718	1.98862	1.64541					1.7888
[truncated: 13 more columns]

## Sheet: Figure 5 I
Baseline ISI (ms)
Sham	OFF L-DOPA	OFF L-DOPA + MgTx
774.844	245.335	244.581
570.123	384.009	408.524
762.3	189.06	322.051
473.26	457.605	306.684
592.129	251.917	669.574
468.141	227.09	734.72
256.746	253.578	650.36
418.461	180.168	297.818
747.703	305.425	398.357
229.178	360.072	477.144
420.52	632.67	417.466
439.464	322.042	380.791
289.056	535.224	208.894
354.181	587.937	219.972
370.296	236.686
620.361	133.573
551.967	535.224
264.924	587.937
518.722	236.686
220.756	133.573
597.853	120.475
423.485	143.896
304.534	330.072
323.367
541.377
257.59
365.048

## Sheet: Figure 5 J
Elicited spikes	OFF L-DOPA																							Sham																									OFF L-DOPA + MgTx
2	103.114	172.45	135.535	146.411	116.94	167.727	82.15	80.725	226.368	198.394	144	289.789	237	228.244	834.51	289.789	237	228.244	107.467	161.519	149.311			684.275	278.89	198.45	300.938	347.645	98.925	158.225	222.35	163.475	119.7	136.507	153.18	148.508	314.125	229.55	159.846	144.222	164.205	499.6	242.367	114.233	106.9	142.654	194.463		197.688
3	198.767	326.525	247.1	194.377	269.55	224.51	155.189	221.256	483.392	373.42	253.87	659.039	510.22	432.583	663.143	510.22	432.583	205.1	279.807	242.04				461.88	403.625	477.95	640.092	197.843	210.058	206.99	181.329	75.175	308.575	166.7	227.656	281.1	167.342	338.76	470.57	285.837	316.28	275.441	509.65	386.35	215.533	164.233	326.033	339.91	334.59
4	384.639	792.425	370.525	389.783	302.317	422.494	316.05	150.5	297.15	626.167	521.256	377.367	942.219	706.663	618.067	342.167	942.219	706.663	618.067	342.167	295.679	356.186	373.9	726.14	422.183	648.575	342.05	320.45	292.35	214.662	415.712	184.6	288.6	382.433	312.175	444.975	674.075	355.675	380.15	740.8	486.9	361.475	213.817	464.35					548.412
[truncated: 13 more columns]
