# Supplementary material for: Striatal cholinergic interneuron pause response requires Kv1 channels, is absent in dyskinetic mice, and is restored by dopamine D5 receptor inverse agonism
Source: eLife. 2025 Jun 24;13:RP102184. doi: 10.7554/eLife.102184 (PMC12187130; doi:10.7554/eLife.102184)
Supplement: Figure 6—source data 1. [file elife-102184-fig6-data1.xlsx]

## Sheet: Figure 6 B
Elicited spikes	OFF L-DOPA														Quinpirole											Sumanirole									Quinpirole 10uM
1	0.819207	1.44436	1.1572	0.999256	1.44436	1.1572	1.09341	0.819562	2.43204	1.42508	0.984768	1.00268	1.0536	1.01038	1.17932	1.08308	1.02048	1.11724	1.03546	1.06039	1.06191	1.33703	1.0074			1.35042	1.16032	1.06568	1.01651	0.865999	0.828127	1.23394	1.07952	0.798262	0.966647	1.46625
2	0.99088	1.27328	1.10698	1.23193	1.10251	1.00257	1.15277	1.60629	1.74844	1.29298	1.05558	1.0606	1.15749		1.2466	1.13832	1.13285	1.04117	1.07364	1.0908	1.70232	1.23021	1.01357	2.46791	1.06563	1.07272	1.2072	1.4952	1.19342	1.01032	1.23588	1.06028	1.30813		1.06885	1.0384	1.15925
3	1.0523	0.811427	1.26662	1.34171	1.08545	0.966082	1.52999	1.55199	1.74891	1.69426	1.27077	1.1302	1.29294		1.05886	1.09239	1.00674	1.03626	1.02076	1.18534	2.10968	1.27691	1.10763	1.9405	1.11377	1.01595	1.47464	1.25129	1.66485	1.18582	1.12237	1.25608	1.62007		1.45138	1.42711	1.14756
4	1.03248	0.985989	0.86164	1.11046	1.38795	0.98907	1.25548	1.46628	1.95951	2.53622	3.20709	1.4183	1.1167	1.15784	1.22794	1.71666	1.1467	1.10689	1.18034	1.33658	1.15358	1.33221	1.02931			1.08327	1.11207	1.15588	2.07519	2.06391	1.29001	2.22525			1.52632	1.56286	1.07687

## Sheet: Figure 6 C
Baseline ISI (ms)
OFF L-DOPA	Quinpirole	Sumanirole	Quinpirole 10uM
245.335	297.04	828.996	240.481
384.009	407.998	582.435	367.372
189.06	465.166	328.199	249.063
457.605	265.74	346.849
251.917	119.888	180.42
227.09	266.123	246.116
253.578	372.184	290.396
429.207	322.248	288.359
672.811	212.143	188.421
374.402	601.066	337.565
270.595	224.19
206.774
129.611
119.282

## Sheet: Figure 6 D
Elicited spikes	OFF L-DOPA														Quinpirole											Sumanirole									Quinpirole 10uM
2	289.789	237	228.244	146.411	116.94	167.727	82.15	129.242	422.203	120.338	146.395	145.269	137.35		325.405	330.31	312.933	247.586	118.15	160.719	91.0333	197.137	189.735	228.256	224.158	355.2	418.668	341.94	128.08	140.308	122.925	301.136	166.181		202.175	287.653	264.371
3	663.143	510.22	432.583	194.377	269.55	224.51	155.189	271.936	797.15	221.305	202.817	270.464	243.17		605.272	586.45	495.821	596.058	201.125	251.559	199.5	291.314	315.02	409.944	424.2	798.407	712.837	500.05	240.312	171.221	550.85	249.863	265.35		410.775	500.312	466.025
4	942.219	706.663	618.067	389.783	302.317	422.494	316.05	423.607	919.6	393.4	282.033	444.45	341.879	329.725	721.88	789.15	679.932	696.49	216.463	367.878	233.507	442.475	411.407			553.775	739.967	259.075	575.779	496.07	760.26	355.425			503.15	588.6	656.219
