# Supplementary material for: Striatal cholinergic interneuron pause response requires Kv1 channels, is absent in dyskinetic mice, and is restored by dopamine D5 receptor inverse agonism
Source: eLife. 2025 Jun 24;13:RP102184. doi: 10.7554/eLife.102184 (PMC12187130; doi:10.7554/eLife.102184)
Supplement: Figure 7—source data 1. [file elife-102184-fig7-data1.xlsx]

## Sheet: Figure 7 C
Elicited spikes	OFF L-DOPA																						Clozapine															Clozapine + SCH23390
1	1.42508	1.0536	2.3309	1.35322	1.1572	0.819207	1.44436	1.1572	1.09341	0.819562	2.43204	4.97811	0.984768	1.00268	1.01038								1.5787	1.5829	1.04499	1.0738	2.09422	1.14339	1.6186	1.0522	3.28081	1.49014	0.929452	1.20612	1.41332			1.75879	0.373511	0.938285	1.47	1.91706	0.98628	0.98816	1.47089	1.28758	1.37632	1.40083	0.881074
2	2.52301	1.71882	1.13006	2.3686	2.21527	1.38964	1.10447	1.26167	1.10698	0.99088	1.27328	1.10698	1.23193	1.10251	1.00257	1.15277	1.60629	1.74844	1.29298	1.05558	1.0606	1.15749	2.14978	1.45232	1.0653	1.35632	1.7333	1.18579	2.22134	1.43304	1.79753	1.18773	1.62673	1.42908	1.03017	1.21106	1.36695	0.762953	1.09886	2.07484	1.95309	1.33736	1.24144	1.2687	1.34609	1.1374	1.7314	0.847907
3	2.755	2.00388	1.02334	2.68983	2.44041	1.49732	0.762574	1.51873	1.26662	1.0523	0.811427	1.26662	1.34171	1.08545	0.966082	1.52999	1.55199	1.74891	1.69426	1.27077	1.1302	1.29294	1.99794	1.82597	1.57345	2.10947	1.37868	2.34808	0.802354	3.11972	1.53525	2.39651	2.24088	2.51242	1.78984	1.37366	2.07433	0.776136	2.23146	1.93673	2.46878	2.04909	1.79287	1.97105	1.31867	1.3613	0.92016
4	2.92833	2.08002	2.78601	0.73974	2.24455	1.0749	1.90777	0.942601	0.86164	1.03248	0.985989	0.86164	1.11046	1.38795	0.98907	1.25548	1.46628	1.95951	2.53622	1.4183	1.1167	1.15784	1.89374	1.226	3.21169	2.0292	1.92754	2.06529	3.70576	3.10737	2.96999	1.96205	1.53423	2.52467				1.4041	2.22139	2.36669	1.98371	1.39976	1.64795	0.944064
[truncated: 38 more columns]

## Sheet: Figure 7 D
Baseline ISI (ms)
OFF L-DOPA	Clozapine	Clozapine + SCH23390	SCH23390	SKF81297	Clozapine + MgTx	Clozapine + Methiothepin
245.335	695.872	587.944	202.651	296.498	329.989	339.237
384.009	731.513	515.197	266.962	203.543	187.379	414.168
189.06	220.977	157.89	207.39	462.268	222.67	665.495
457.605	406.95	563.892	265.111	712.815	169.742	594.189
251.917	518.045	316.076	210.986	509.44	449.956	457.044
227.09	441.923	259.324	274.235	685.191	266.784	675.4
253.578	544.894	240.492	541.377		495.006	611.356
180.168	587.286	276.274	774.679		317.499	491.238
305.425	326.289	472.068	441.675		212.186	266.072
535.224	614.723	210.593			238.141	201.185
587.937	255.255	325.601			235.379	380.602
236.686	248.431	307.429			303.119
133.573	375.755
120.475	317.584
143.896	291.775
330.072
762.468
429.207
672.811
374.402
270.595
206.774
129.611
119.282

## Sheet: Figure 7 E
Elicited spikes	OFF L-DOPA																						Clozapine															Clozapine + SCH23390
2	103.114	172.45	135.535	146.411	116.94	167.727	82.15	80.725	226.368	289.789	237	228.244	107.467	161.519	149.311	129.242	422.203	120.338	146.395	145.269	137.35	139.91	242.05	202.662	132.689	244.433	391.468	171.27	155.906	172.738	149.72	177.95	156.67	119.107	117.514	145.009	135.7	362.58	171.842	124.117	110.533	135.425	123.805	147.177	136.127	127.776	192.383	170.769
3	198.767	326.525	247.1	194.377	269.55	224.51	155.189	221.256	483.392	663.143	510.22	432.583	205.1	279.807	242.04	271.936	797.15	221.305	202.817	270.464	243.17	241.59	373.193	298.45	275.442	489.25	662.586	374.621	274.85	311.075	235.319	231.829	203.056	241.04	189.204	316.75	262.207	582.32	261.531	171.156	210.82	307.493	207.527	297.244	236.239	306.544	322.45
4	384.639	792.425	370.525	389.783	302.317	422.494	316.05	150.5	297.15	942.219	706.663	618.067	295.679	356.186	373.9	423.607	919.6	393.4	282.033	444.45	341.879	329.725	658.214	426.511	378.575	594.124	463.077	313.95	358.367	170.3	324.55	318.25	453.09	342.642				507.5	227.2	498.95	293.7	472.483	338.9	387.3
[truncated: 40 more columns]
